# Supplementary material for: Synthesis, crystal structure and water oxidation activity of [Ru(terpy)(bipy)Cl]+ complexes: influence of ancillary ligands on O2 generation
Source: Royal Society of Chemistry journal article supplement (doi:10.1039/c7ra07186h), 2017-01-01
Supplement: c7ra07186h1.pdf [file c7ra07186h1.pdf]

## Electronic Supplementary Information (ESI)

### Synthesis, crystal structure and water oxidation activity of [Ru(terpy)(bipy)Cl]<sup>+</sup> complexes: Influence of ancillary ligands on O<sub>2</sub> generation

Rekha Dhiman, Namita Singh, Bharat Ugale and C. M. Nagaraja\*

*Department of Chemistry, Indian Institute of Technology Ropar, Rupnagar 140001, Punjab, India. Email: [cmnraja@iitrpr.ac.in](mailto:cmnraja@iitrpr.ac.in)*

#### Contents

1. **Fig. S1:** <sup>1</sup>H NMR spectrum of complex **1** in DMSO-d<sub>6</sub>.
2. **Fig. S2:** <sup>1</sup>H NMR spectrum of complex **2** in DMSO-d<sub>6</sub>.
3. **Fig. S3:** <sup>1</sup>H NMR spectrum of complex **3** in DMSO-d<sub>6</sub>.
4. **Fig. S4:** <sup>1</sup>H NMR spectrum of complex **4** in DMSO-d<sub>6</sub>.
5. **Table S1:** Selected bond distances (Å) and angles (°) for complexes **1** & **2**.
6. **Table S2:** First order rate data.
7. **Fig. S5:** <sup>1</sup>H NMR analysis of complex **2** in a 1:1 ACN-d<sub>3</sub>/D<sub>2</sub>O mixture.
9. **Fig. S6:** ESI-MS analysis of regenerated complex **2**.
10. **Scheme S1:** Regeneration of the catalyst **2** involving the oxidation of the MeMPTP ligand
11. **Fig. S7:** ESI-MS analysis of MeMPTP ligand after reaction with CAN.

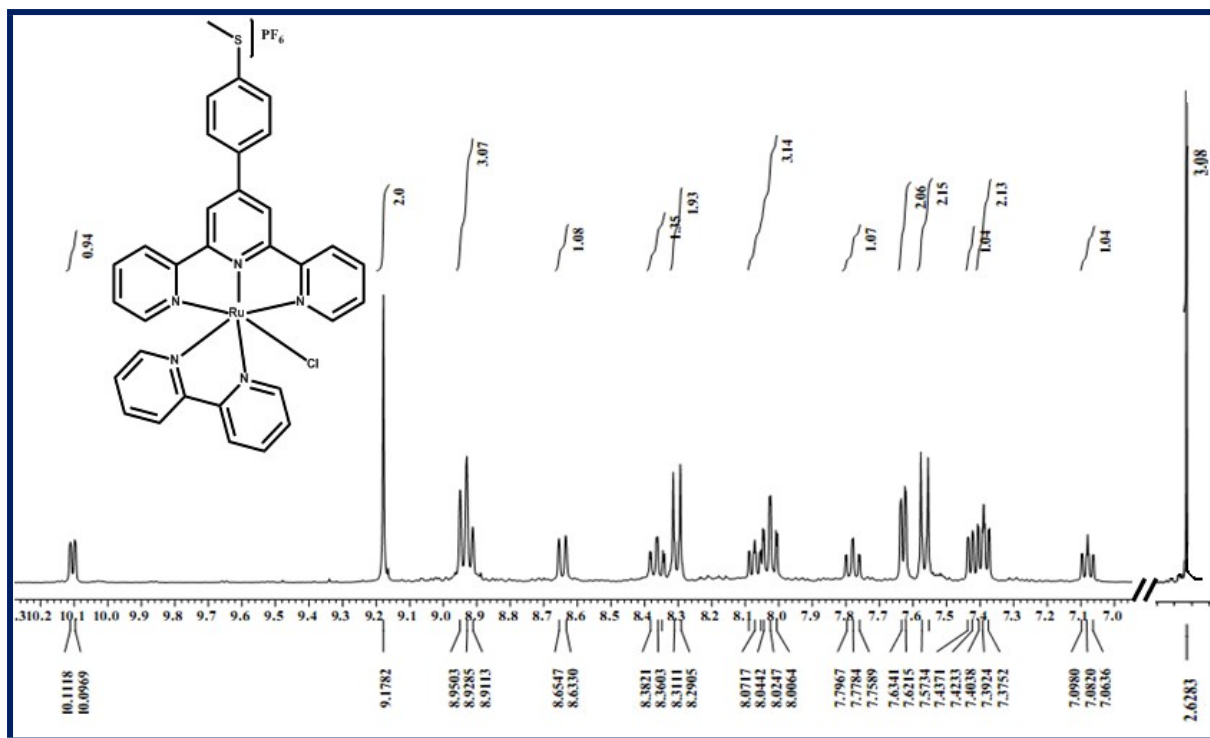

**Fig. S1:** <sup>1</sup>H NMR spectrum of complex **1** in DMSO-d<sub>6</sub>

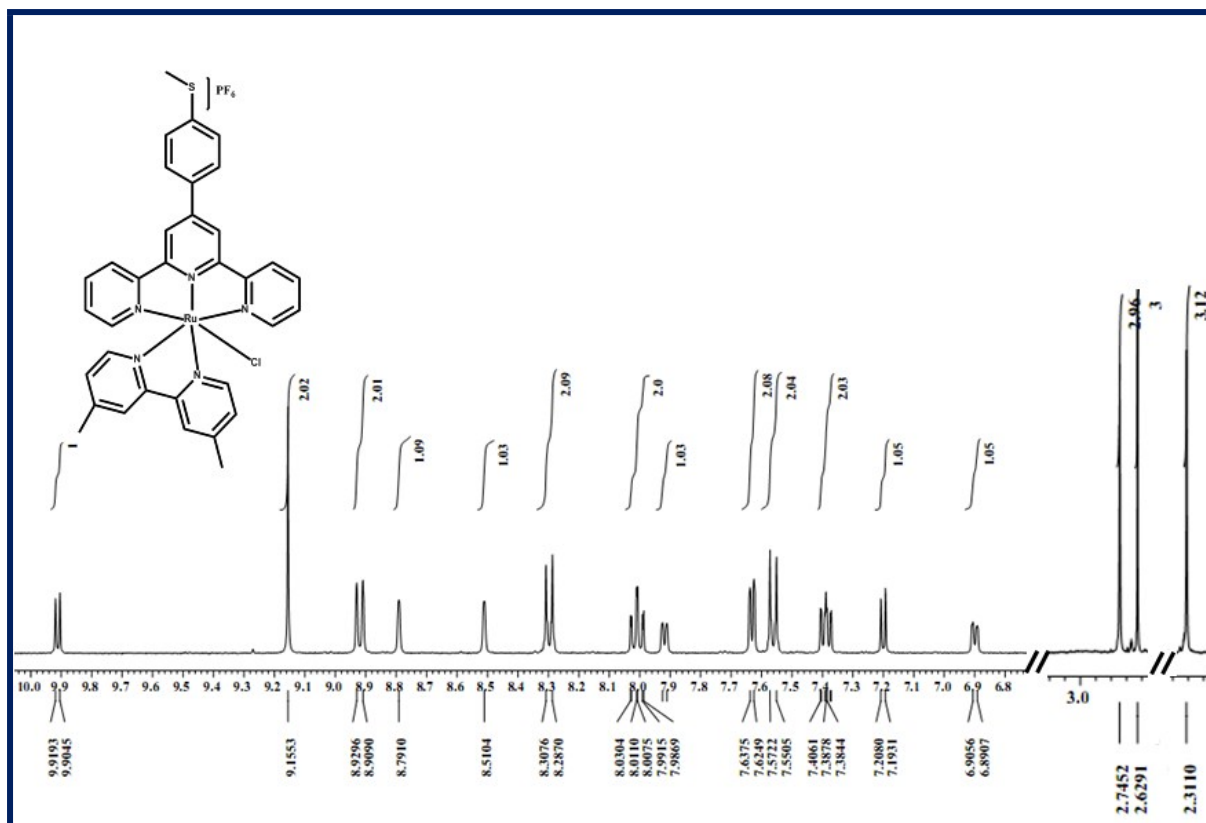

Fig. S2:  $^1\text{H}$  NMR spectrum of complex 2 in  $\text{DMSO-d}_6$

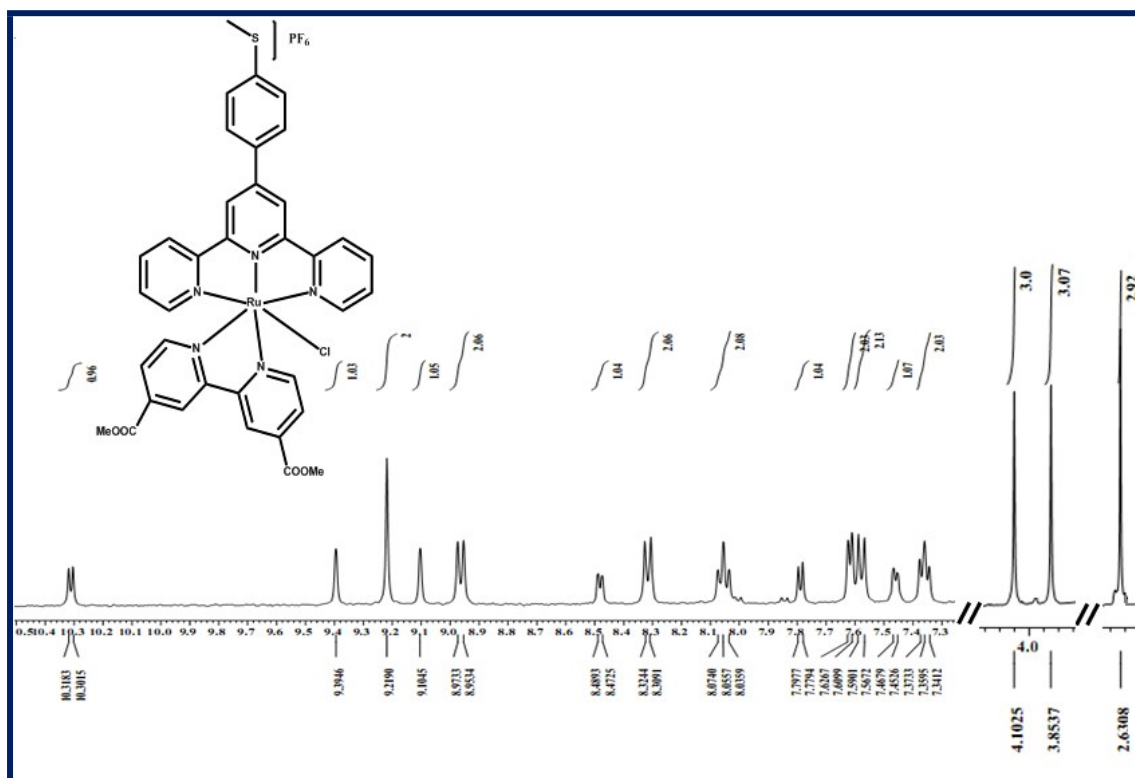

Fig. S3:  $^1\text{H}$  NMR spectrum of complex 3 in  $\text{DMSO-d}_6$

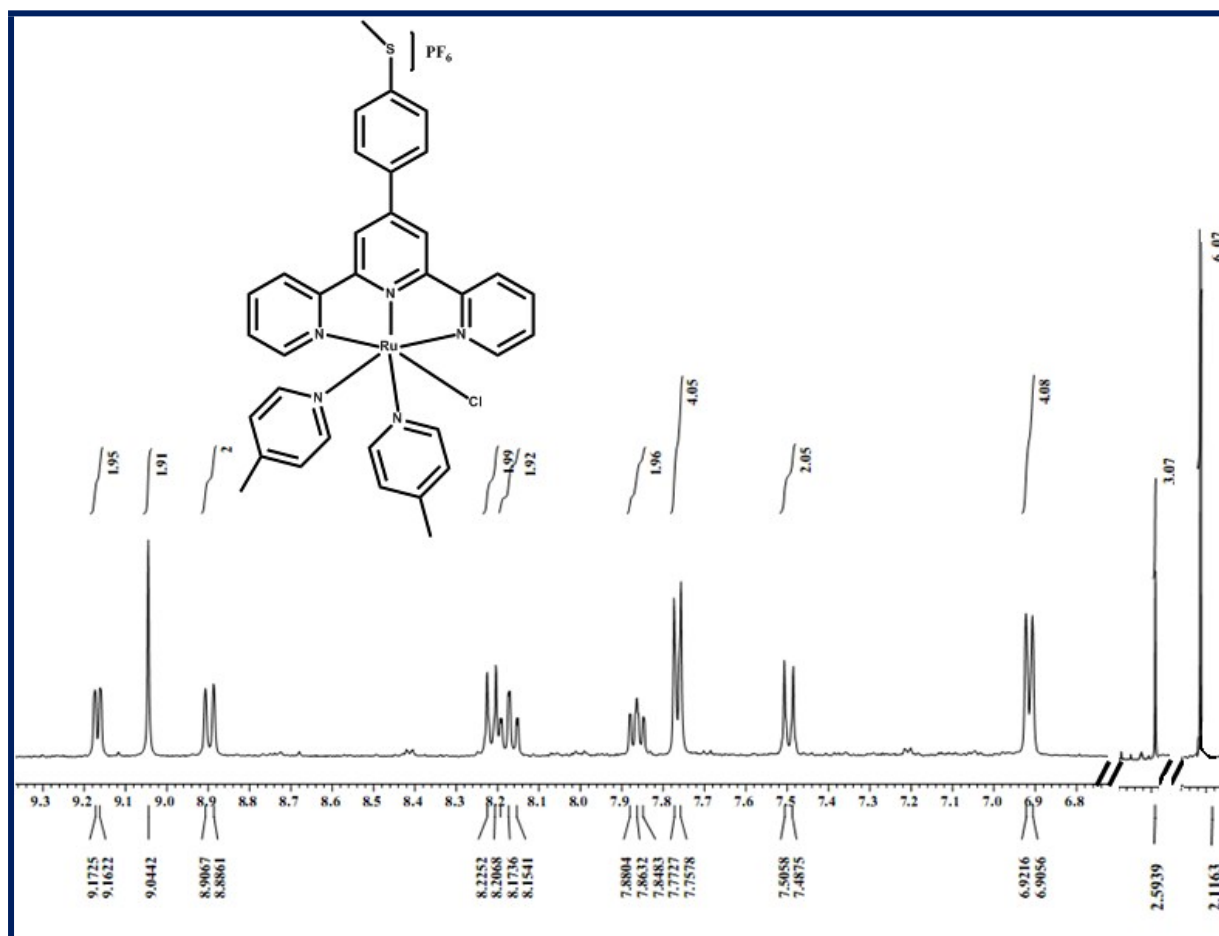

**Fig. S4:**  $^1\text{H}$  NMR spectrum of complex 4 in  $\text{DMSO-d}_6$

**Table S1:** Selected bond distances (Å) and angles (°) for complexes **1** & **2**

| Complex 1  |            |           |            |
|------------|------------|-----------|------------|
| Ru1-N1     | 2.078(6)   | Ru1-N5    | 2.066(6)   |
| Ru1-N2     | 2.042(6)   | Ru1-N6    | 1.942(6)   |
| Ru1-N3     | 2.065(6)   | Ru1-Cl1   | 2.410(19)  |
| Cl1-Ru1-N1 | 95.33(17)  | N1-Ru1-N6 | 172.7(2)   |
| Cl1-Ru1-N2 | 170.01(16) | N2-Ru1-N3 | 87.4(2)    |
| Cl1-Ru1-N3 | 88.74(17)  | N2-Ru1-N5 | 96.7(2)    |
| Cl1-Ru1-N5 | 89.37(17)  | N2-Ru1-N6 | 95.0(2)    |
| Cl1-Ru1-N6 | 91.15(16)  | N3-Ru1-N5 | 159.0(2)   |
| N1-Ru1-N2  | 78.9(2)    | N3-Ru1-N6 | 79.2(2)    |
| N1-Ru1-N3  | 104.2(2)   | N5-Ru1-N6 | 79.9(2)    |
| N1-Ru1-N5  | 96.9(2)    |           |            |
| Complex 2  |            |           |            |
| Ru1-N1     | 2.070(3)   | Ru1-N4    | 2.040(2)   |
| Ru1-N2     | 1.951(3)   | Ru1-N5    | 2.060(3)   |
| Ru1-N3     | 2.084(3)   | Ru1-Cl1   | 2.413(13)  |
| Cl1-Ru1-N1 | 89.54(6)   | N1-Ru1-N5 | 159.32(10) |
| Cl1-Ru1-N2 | 90.34(7)   | N2-Ru1-N3 | 173.40(10) |
| Cl1-Ru1-N3 | 94.85(6)   | N2-Ru1-N4 | 96.42(9)   |
| Cl1-Ru1-N4 | 173.24(7)  | N2-Ru1-N5 | 79.80(10)  |
| Cl1-Ru1-N5 | 89.95(6)   | N3-Ru1-N4 | 78.40(9)   |
| N1-Ru1-N2  | 79.53(10)  | N3-Ru1-N5 | 96.10(10)  |
| N1-Ru1-N3  | 104.54(10) | N4-Ru1-N5 | 91.17(9)   |
| N1-Ru1-N4  | 91.76(9)   |           |            |

**Table S2:** First order rate data

| Complex | $K \times 10^{-3}$ | $R^*$  | $t_{1/2}$ |
|---------|--------------------|--------|-----------|
| 1       | 9.0                | 0.9957 | 77        |
| 2       | 4.5                | 0.9966 | 154       |
| 3       | 1.8                | 0.9987 | 384       |
| 4       | 5.3                | 0.9973 | 130       |

\* R indicates the goodness of fit to a linear trace.

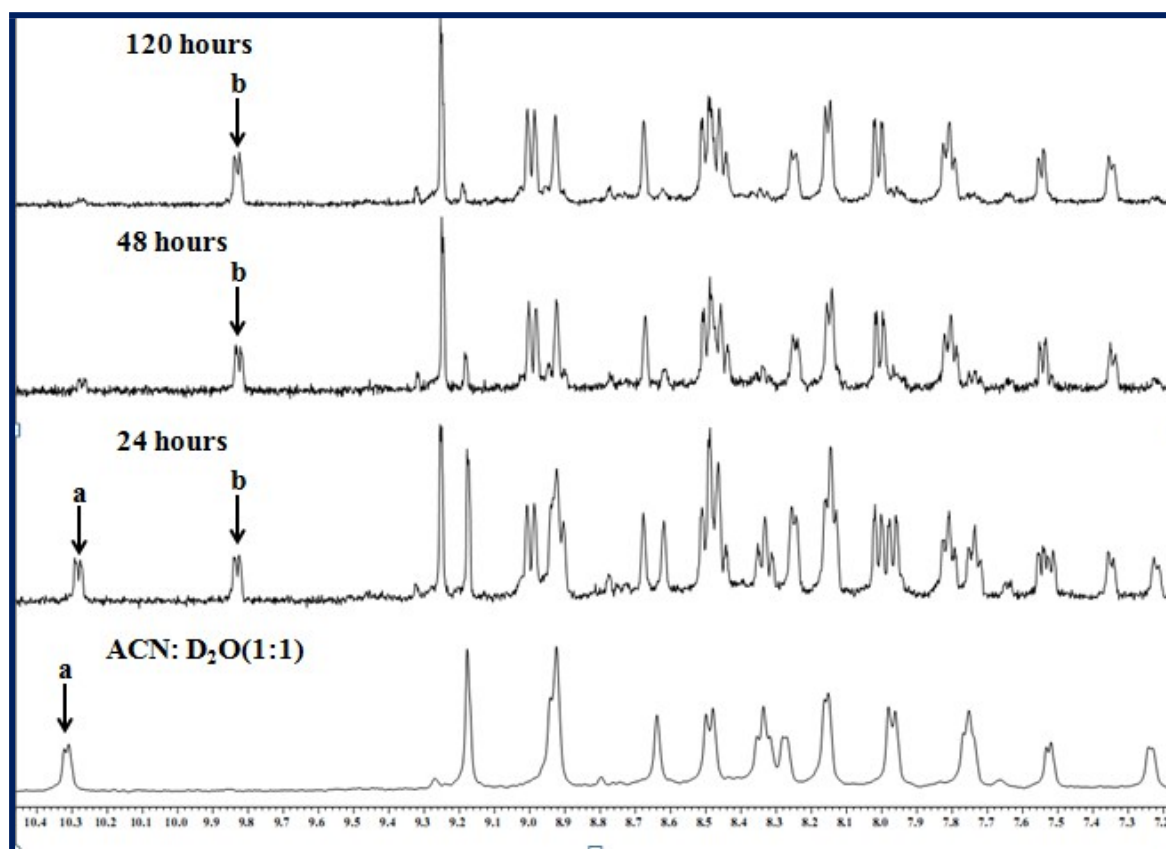

**Fig. S5:** <sup>1</sup>H NMR stack plot of complex 2 in 1:1 ACN-d<sub>3</sub>/D<sub>2</sub>O mixture with labeling of the peak due to H11 proton (a) adjacent to (chlorido), (b) adjacent to (aqua) ligand.

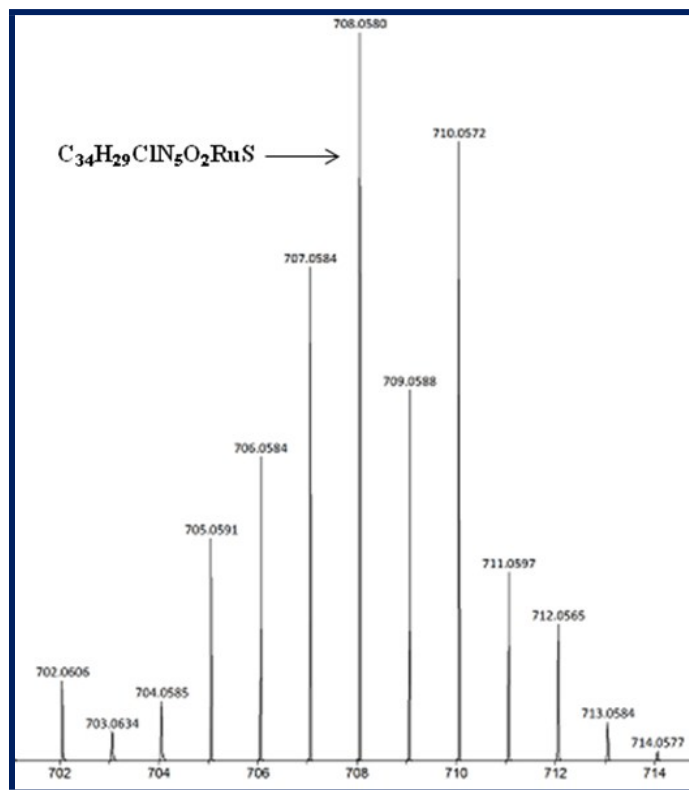

**Fig. S6:** ESI-MS spectrum of isolated complex **2** after oxidation with CAN showing the molecular ion peak at  $m/z$  708.077.

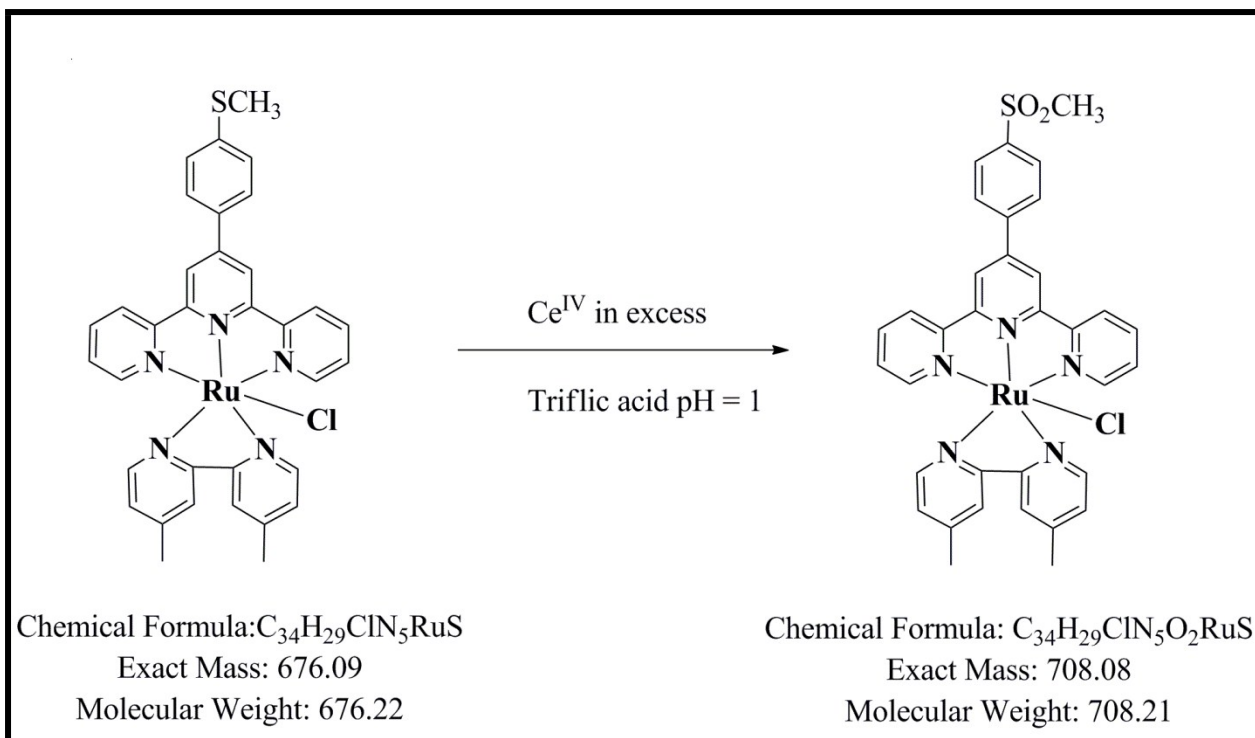

**Scheme S1:** Regeneration of the catalyst **2** involving the oxidation of the MeMPTP ligand

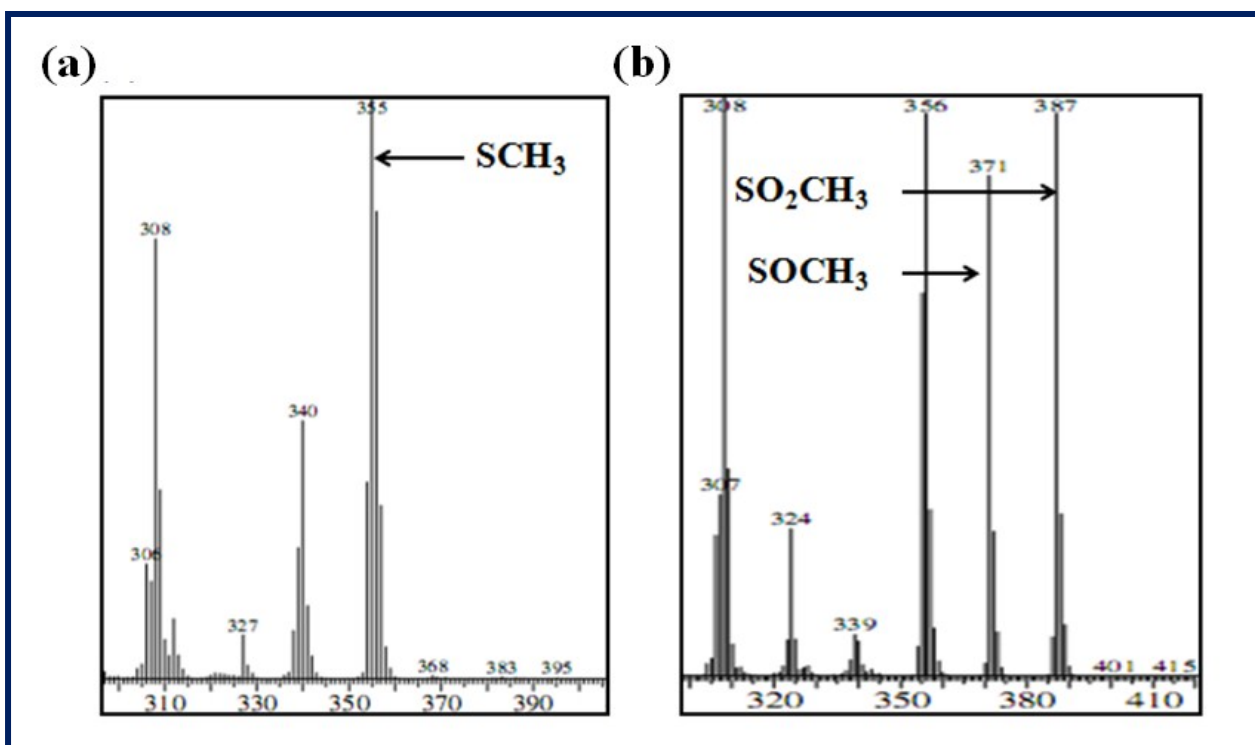

**Fig. S7:** ESI-MS spectra of MeMPTP ligand before (a) and after (b) treating with CAN.
